# Supplementary material
Source: Royal Society of Chemistry journal article supplement (doi:10.1039/d5va00473j)
Supplement: d5va00473j1.pdf [file d5va00473j1.pdf]

1 **Supplementary Information**

2  
3 **Depth Profiles of PFAS in Community Garden and Agricultural Soils**

4  
5 Biraj Saha <sup>a</sup>, Mohamed Ateia <sup>b, c</sup>, Sujan Fernando <sup>d</sup>, Thomas DeSutter <sup>e</sup>, Syeed Md  
6 Iskander <sup>a, f\*</sup>

7  
8 a Department of Civil, Construction and Environmental Engineering, North Dakota State  
9 University, Fargo, ND, 58102, United States

10 b Department of Chemical and Biomolecular Engineering, Rice University, Houston, TX,  
11 77005, United States

12 c AECOM Technical Services, Inc., Austin, TX, 78729, United States

13 d Department of Civil and Environmental Engineering, Clarkson University, Potsdam,  
14 NY, 13699, United States

15 e Department of Soil Science, North Dakota State University, Fargo, ND, 58108, United  
16 States

17 f Environmental and Conservation Sciences, North Dakota State University, Fargo, ND,  
18 58108, United States

19  
20 **Number of Text sections = 7**

21 **Number of Tables = 15**

22 **Number of Figures = 9**

23  
24  
25 Intended for: **Environmental Science: Advances**

26 Type of contribution: **Research Article**

27 \*Corresponding author. Phone: (701) 231-1716; Fax: 701-231-6485

28 Email: [syeed.iskander@ndsu.edu](mailto:syeed.iskander@ndsu.edu)

29 Address: 1410 14th Ave N, CIE 201, Fargo, ND 58102

30

**Table of Contents**

|                  |                                                                                                                                                                                                                                                                                                                             |         |
|------------------|-----------------------------------------------------------------------------------------------------------------------------------------------------------------------------------------------------------------------------------------------------------------------------------------------------------------------------|---------|
| <b>Text S1</b>   | Details of the PFAS extraction from soil.                                                                                                                                                                                                                                                                                   | S5      |
| <b>Text S2</b>   | Details of the quality assurance and quality control (QA/QC) measures for PFAS extraction and analysis.                                                                                                                                                                                                                     | S5–S6   |
| <b>Text S3</b>   | Description of the UPLC–MS/MS analysis for PFAS quantification.                                                                                                                                                                                                                                                             | S6      |
| <b>Text S4</b>   | Details of the moisture content, pH, conductivity, and dissolved organic matter analysis process for soil samples.                                                                                                                                                                                                          | S6–S7   |
| <b>Text S5</b>   | Details of ultraviolet and fluorescence 3D excitation-emission matrix spectroscopy to characterize dissolved organic matter extracted from soils.                                                                                                                                                                           | S7–S8   |
| <b>Text S6</b>   | Anions and cation exchange capability measurement in soils.                                                                                                                                                                                                                                                                 | S8      |
| <b>Text S7</b>   | Details of the statistical analyses conducted in this study.                                                                                                                                                                                                                                                                | S9      |
| <b>Table S1</b>  | Sampling location coordinates for community garden soils. Samples were collected from each location at depths of 0, 1, and 2 ft and composited depth-wise to represent community garden soils within each depth category. Exact coordinates were not available for the agricultural and background soil sampling locations. | S10     |
| <b>Table S2</b>  | Certified concentrations of the mass-labelled PFAS in the PFAS extraction standard solution/mixture (MPFAC-HIF-ES, Wellington Laboratories, Canada).                                                                                                                                                                        | S10     |
| <b>Table S3</b>  | Extracted internal standard (EIS) and non-extracted internal standard (NIS) were utilized for the quantification of targeted PFAS in this study.                                                                                                                                                                            | S11–S12 |
| <b>Table S4</b>  | Investigated PFAS, their classes, and subclasses. The number in parentheses refers to the number of carbons in that PFAS.                                                                                                                                                                                                   | S13     |
| <b>Table S5</b>  | The gradient program is used to run the Ultra-performance liquid chromatography (UPLC–MS/MS) analysis. Mobile Phase A = 5 mM ammonium acetate in LC-MS grade water, and Mobile Phase B = LC-MS grade Acetonitrile.                                                                                                          | S14     |
| <b>Table S6</b>  | Soil physiochemical characteristics, including conductivity, moisture, organic matter, cation exchange capability, concentration of anions, pH, soil texture, DOM components, ultraviolet, and fluorescence 3D excitation-emission matrix (3D EEM) spectroscopy indices for characterizing soils.                           | S14     |
| <b>Table S7</b>  | Fluorescence 3D excitation-emission matrix spectroscopy parameters of the dissolved organic matter extracted from soils at different depths.                                                                                                                                                                                | S15     |
| <b>Table S8</b>  | The details of ultraviolet and fluorescence 3D excitation-emission matrix (3D EEM) spectroscopy indices used to characterize the dissolved organic matter (DOM) extracted from soils.                                                                                                                                       | S16     |
| <b>Table S9</b>  | Normality test of the analyzed PFAS in the community garden and agricultural soil. PFAS concentrations are reported on a dry-weight basis.                                                                                                                                                                                  | S17     |
| <b>Table S10</b> | Kruskal-Wallis one-way ANOVA analysis (significant at 0.05) of the individual PFAS compounds in community garden soil and                                                                                                                                                                                                   | S17     |

|                  |                                                                                                                                                                                                                                                                                                                                                                                                                                                                                                                                                                                                                                    |     |
|------------------|------------------------------------------------------------------------------------------------------------------------------------------------------------------------------------------------------------------------------------------------------------------------------------------------------------------------------------------------------------------------------------------------------------------------------------------------------------------------------------------------------------------------------------------------------------------------------------------------------------------------------------|-----|
|                  | agricultural soil.                                                                                                                                                                                                                                                                                                                                                                                                                                                                                                                                                                                                                 |     |
| <b>Table S11</b> | Detected PFAS species and their concentrations in community garden, agricultural, and background soils. Linear and branched isomers were combined for PFHxS and PFOS and counted as one PFAS species for each compound. Numbers in parentheses indicate the carbon number of the corresponding PFAS compound.                                                                                                                                                                                                                                                                                                                      | S18 |
| <b>Table S12</b> | Kruskal-Wallis one-way ANOVA analysis (significant at 0.05) of PFAS classes, and total PFAS in community garden soil and agricultural soil.                                                                                                                                                                                                                                                                                                                                                                                                                                                                                        | S19 |
| <b>Table S13</b> | Polynomial regression analysis between soil organic matter (SOM) and PFAS classes, and total PFAS at different depths in the community garden and agricultural soil.                                                                                                                                                                                                                                                                                                                                                                                                                                                               | S19 |
| <b>Table S14</b> | Polynomial regression analysis between dissolved organic matter (DOM) and PFAS classes, total PFAS at different depths in the community garden and agricultural soil.                                                                                                                                                                                                                                                                                                                                                                                                                                                              | S19 |
| <b>Table S15</b> | Polynomial regression analysis between cation exchange capacity (CEC) and PFAS classes, total PFAS at different depths in the community garden, and agricultural soil.                                                                                                                                                                                                                                                                                                                                                                                                                                                             | S20 |
| <b>Figure S1</b> | Study area map showing the approximate locations of the community garden, background, and agricultural soil sampling sites, with the background soil site located approximately 200 ft west of the community garden soil location, the corn ( <i>Zea mays</i> ) agricultural field approximately 25 miles west of the community garden soil location, the soybean ( <i>Glycine max</i> ) field approximately 2 miles west of the corn field, and the sunflower ( <i>Helianthus annuus</i> ) field approximately 2 miles west of the soybean field.                                                                                 | S21 |
| <b>Figure S2</b> | Concentrations of analyzed PFAS in community garden soil. Eight perfluorocarboxylic acid PFAS species (A) and three perflurosulfonic acid PFAS species (B) were detected in community garden soil in all analyzed depths. The mean and standard error of each compound were calculated from two replicates. Extended forms of PFAS are available in Table S3.                                                                                                                                                                                                                                                                      | S22 |
| <b>Figure S3</b> | Concentrations of analyzed PFAS in agricultural soil. Nine perfluorocarboxylic acid PFAS species (A) and three perflurosulfonic acid PFAS species (B) were detected in community garden soil in all analyzed depths. The mean and standard error of each compound were calculated from two replicates. Extended forms of PFAS are available in Table S3.                                                                                                                                                                                                                                                                           | S23 |
| <b>Figure S4</b> | Spearman correlation analysis between soil physicochemical properties and individual PFAS compounds at different soil depths in the community garden and agricultural soil. Physicochemical properties include soil conductivity, moisture content (MC), soil organic matter (SOM), dissolved organic matter (DOM), and pH. The red circle with "*" denotes a significant correlation between the pairs. The red color in the right-side bar indicates the intensity of a strong correlation, and the blue color denotes the intensity of a weak correlation among the pairs. Extended forms of the PFAS are provided in Table S3. | S24 |

|                  |                                                                                                                                                                                                                                                                                                                                                                                                                                                                                                                                                                                                                                                                                                                                                                                                                                                                                                               |     |
|------------------|---------------------------------------------------------------------------------------------------------------------------------------------------------------------------------------------------------------------------------------------------------------------------------------------------------------------------------------------------------------------------------------------------------------------------------------------------------------------------------------------------------------------------------------------------------------------------------------------------------------------------------------------------------------------------------------------------------------------------------------------------------------------------------------------------------------------------------------------------------------------------------------------------------------|-----|
| <b>Figure S5</b> | (A-C). Fluorescence three-dimensional excitation–emission matrix (3D EEM) spectra of dissolved organic matter (DOM) in agricultural soil. The three-dimensional data were plotted as two-dimensional contour plots to elucidate different organic fractions in soil DOM. Peaks A and B represent humic-like and fulvic-like substances, respectively. The highest fluorescence intensities of these peaks were considered to infer the relative levels of humic- and fulvic-like substances in soils across depths. Detailed excitation and emission wavelengths corresponding to the identified peaks are listed in Table S6.                                                                                                                                                                                                                                                                                | S25 |
| <b>Figure S6</b> | Spearman correlation analysis between dissolved organic matter characteristics and PFAS classes, including total PFAS at different soil depths in the community garden and agricultural soil. The highest intensity of humic- and fulvic-like substances was considered to infer the relative levels of these components in soils at various depths, providing an indirect measure of their concentrations. Fluorescence index (FI), biological index (BIX), and humification index (HIX) were calculated based on excitation and emission absorbance data. The green circle with ‘*’ denotes a significant correlation between the pairs. The green color in the right-side bar indicates the intensity of a strong correlation, and the orange color denotes the intensity of a weak correlation among the pairs. Extended forms of the PFAS are provided in Table S3.                                      | S26 |
| <b>Figure S7</b> | Spearman correlation analysis between soil texture, DOM components, fluorescence indices, and analyzed PFAS in community garden and agricultural soil across depths. Soil texture represents the percentage of sand, clay, and silt. The highest intensity of humic- and fulvic-like substances was considered to infer the relative levels of these components in soils at various depths, providing an indirect measure of their concentrations. Fluorescence index (FI), biological index (BIX), and humification index (HIX) were calculated based on excitation and emission absorbance data. The blue circle with ‘*’ denotes a significant correlation between the pairs. The blue color in the right-side bar indicates the intensity of a strong correlation, and the purple color denotes the intensity of a weak correlation among the pairs. Extended forms of the PFAS are provided in Table S3. | S27 |
| <b>Figure S8</b> | Spearman correlation analysis between cation exchange capacity, anion concentrations, and analyzed PFAS in the community garden and agricultural soil across depths. Among the measured anions, phosphate ( $\text{PO}_4^{3-}$ ) was excluded from this analysis because it was detected only in surface soil from the community garden. The pink circle with ‘*’ denotes a significant correlation between the pairs. The pink color in the right-side bar indicates the intensity of a strong correlation, and the green color denotes the intensity of a weak correlation among the pairs. Extended forms of the PFAS are provided in Table S3.                                                                                                                                                                                                                                                            | S28 |
|                  | Vertical distribution of total PFAS concentrations in different                                                                                                                                                                                                                                                                                                                                                                                                                                                                                                                                                                                                                                                                                                                                                                                                                                               |     |

|                  |                                                                                                                                                                                                                                                                                                                                                                                                                                                                                                                                |     |
|------------------|--------------------------------------------------------------------------------------------------------------------------------------------------------------------------------------------------------------------------------------------------------------------------------------------------------------------------------------------------------------------------------------------------------------------------------------------------------------------------------------------------------------------------------|-----|
| <b>Figure S9</b> | environmental matrices. The data for this figure were collected from our previous studies [1, 19]. A. Total PFAS concentrations in an idle yard waste compost pile at different depths. Compost A, Compost B, and Compost C are three randomly selected locations within the compost pile. B. Total PFAS concentrations in landfill organics at different depths. Landfill organics were collected during boring for gas-well installation; a total of seven gas wells were investigated and results for three are shown here. | S29 |
|------------------|--------------------------------------------------------------------------------------------------------------------------------------------------------------------------------------------------------------------------------------------------------------------------------------------------------------------------------------------------------------------------------------------------------------------------------------------------------------------------------------------------------------------------------|-----|

33

34

35

36

37 **Text S1.** Details of the PFAS extraction from soil.

38

39

Ten grams of soil from each soil were taken in duplicates in pre-cleaned 50 mL polypropylene tubes for PFAS extraction. Then, 100 µL mass-labeled PFAS internal standard (MPFAC-HIF-ES, Wellington Laboratories, Guelph, ON, Canada) was added to the sample and adequately mixed (Table S2). The targeted analytes, extracted internal standards, and non-extracted internal standards were similar to the EPA method 1633 (Table S3). PFAS were extracted from soil samples using a multi-step solvent extraction procedure. 8 mL of LC–MS grade methanol containing 0.3% ammonium hydroxide (Fisher Scientific, USA) was added to each sample tube, followed by shaking at 200 rpm for 24 hours using a shaker (Thermo Scientific, MA, USA) and centrifugation at 10,000 rpm for 2 hours at room temperature. The resulting supernatant was transferred to pre-cleaned 15 mL polypropylene tubes. A second extraction was performed by adding 2 mL of the same methanol–ammonium hydroxide solution to the remaining residue, shaking for 2 hours, and centrifuging for 30 minutes; the supernatant was then combined with that from the first extraction. For the third extraction, 2 mL of LC–MS grade methanol containing 0.3% ammonium hydroxide was added, vortexed for 5 minutes, centrifuged, and the resulting supernatant was merged with the previous extracts. The combined extract was concentrated to approximately 1 mL using a nitrogen blowdown evaporator and stored at 4 °C until PFAS analysis.

56

57 **Text S2.** Details of the quality assurance and quality control (QA/QC) measures for PFAS extraction and analysis.

58

59

All the soil samples were extracted for PFAS in duplicate. The PFAS concentration was averaged based on the duplicate results, and the error bars are also shown in the plots. We also prepared and analyzed blank samples by following the same PFAS extraction protocol for the soils. For preparing blanks, we took 10 mL of LC-MS grade methanol in a 50 mL polypropylene

64 tube and then added 100  $\mu\text{L}$  of the mixture of mass-labeled PFAS internal standard (MPFAC-  
65 HIF-ES; Wellington Lab, Guelph, ON). Then, tubes were agitated at 200 rpm for overnight,  
66 followed by centrifugation at 10000 rpm for 2 hours. After centrifuging, the content was  
67 concentrated to 1 mL with a nitrogen blowdown evaporator prior to 10  $\mu\text{L}$  injection in the LC. An  
68 eight-point calibration (range 9–20,000  $\text{ng L}^{-1}$ ) curve was used for quantification using isotopic  
69 dilution and internal calibration methods. A regression fit of  $r^2 > 0.99$  was set as the minimum  
70 requirement for the standards before performing quantification. The extraction efficiency of the  
71 mass-labeled internal standard for our samples ranged from 58 to 126%.

72 **Text S3.** Description of the UPLC–MS/MS analysis for PFAS quantification.

73 LC-MS grade 5 mM ammonium acetate in water (solution A) and acetonitrile (solution B)  
74 were utilized in a gradient solvent program for the analytes [1] (Table S5). A negative  
75 electrospray ionization analysis method was used. The capillary voltage was set to 1.5 kV, the  
76 flow rate of the desolvation gas (nitrogen) at 750  $\text{L h}^{-1}$ , and the temperature at 350  $^{\circ}\text{C}$ .  
77 Additionally, a 325  $^{\circ}\text{C}$  temperature setting was used for the ion transfer tube.

78

79 **Text S4.** Details of the moisture content, pH, conductivity, and dissolved organic matter analysis  
80 process for soil samples.

81

82 The moisture content of soil samples was measured following the ASTM D2974 method  
83 [2]. Briefly, a known mass of fresh soil was dried at 105  $^{\circ}\text{C}$  until a constant weight was  
84 achieved. Moisture content was calculated based on the mass loss after drying and expressed  
85 as a percentage of the initial wet soil mass.

86

87 The pH and electrical conductivity of soil samples were measured using aqueous soil  
88 extracts prepared following the ASTM D3987-12 protocol [3]. Briefly, dried and homogenized  
89 soil samples were mixed with deionized water at a soil-to-water ratio of 1:10 (w/v). The  
90 suspensions were shaken for 24 h at room temperature, centrifuged at 10,000 rpm for 20 min,  
91 and filtered through 0.45  $\mu\text{m}$  membrane filters. The pH of the filtrates was measured using a pH  
92 meter (Mettler Toledo, Fisher Scientific, USA), and electrical conductivity was measured using a  
93 conductivity meter (Mettler Toledo, Fisher Scientific, USA). The pH meter was calibrated using  
94 standard buffer solutions at pH 4.0, 7.0, and 10.0, while the conductivity meter was calibrated  
95 using standard conductivity solutions of 1,413  $\mu\text{S cm}^{-1}$  and 12,880  $\mu\text{S cm}^{-1}$  before analysis.

96

97 Dissolved organic matter (DOM) was quantified using the same filtered aqueous  
98 extracts. The filtrates were stored at 4 °C before analysis and analyzed using a Shimadzu total  
99 organic carbon (TOC) analyzer. DOM concentrations were reported based on the dissolved  
100 organic carbon content measured in the filtered extracts.

101

102 **Text S5.** Details of ultraviolet and fluorescence 3D excitation-emission matrix spectroscopy to  
103 characterize dissolved organic matter extracted from soils.

104

105 To avoid inner-filter effects on fluorescence 3D excitation-emission matrix (3D EEM) and  
106 ultraviolet-visible (UV-Vis) spectroscopy, the dissolved organic carbon concentration was  
107 normalized to 20 mg L<sup>-1</sup> for all the extract samples before analysis [4]. UV absorbance of the  
108 extract samples was measured at 254 nm wavelength using a Genesys 150 UV-visible  
109 spectrophotometer (Thermo Scientific, USA). SUVA<sub>254</sub> was calculated by dividing the UV  
110 absorbance at 254 nm by the DOC concentration [5].

111

112 An FP-8350 spectrofluorometer (Jasco Inc., Japan) was used to perform the excitation  
113 and emission matrix for characterizing the DOM in soils based on the fluorescence intensity at  
114 emission wavelengths ranging from 250 to 550 nm and excitation wavelengths ranging from 200  
115 to 500 nm. The fluorescence spectra were scanned with a slit width of 5 nm and a scanning  
116 speed of 2000 nm min<sup>-1</sup> [6]. Spectral indices were calculated from the fluorescence 3D EEM  
117 spectroscopy, following the previously reported definition for fluorescence index (FI), biological  
118 index (BIX), and humification index (HIX) [6]. FI was calculated by the ratios of fluorescence  
119 intensity at emission wavelengths of 470 nm to 520 nm (excitation wavelength of 370 nm). BIX  
120 was calculated by the ratios of fluorescence intensity at emission wavelengths of 380 nm to 430  
121 nm (excitation wavelength of 310 nm). HIX was calculated by dividing the average intensity at  
122 emission wavelength from 435 to 480 nm by the average intensity at emission wavelength from  
123 300 to 345 nm; both measured at the excitation wavelength of 255 nm [7]. HIX has been widely  
124 used to indicate the degree of humification in DOM [7]. When HIX<0.8, the degree of  
125 humification is low; when HIX>0.8, the degree of humification is high [7]. FI is typically employed  
126 to distinguish the sources of DOM. Microbial activity is the main source of DOM for FI>1.8, and  
127 the contribution of microbial activity is low when FI<1.5 [6]. Biological Index (BIX) is commonly  
128 employed to estimate the biological components in any organic medium. BIX>0.7 indicates  
129 medium to high levels of biological components due to high microbial activity in soils, whereas  
130 BIX<0.7 indicates low levels of biological components [6].

131

132 **Text S6.** Anions and cation exchange capability measurement in soils.

133

134 To analyze anions in soils, we dissolved each soil sample in deionized water at a ratio of  
135 1:10 (w/v) and subjected it to shaking for 24 hours. Following this, the suspension underwent  
136 centrifugation at 10,000 rpm for 20 minutes and was filtered through a Millipore 0.45  $\mu\text{m}$   
137 membrane filter. The resulting filtrate was stored at 4 °C before undergoing analysis. The  
138 quantification of anions, including chloride, sulphate, phosphate, nitrite, and nitrate, was carried  
139 out using ion chromatography (Thermo Scientific, DIONEX ICS 6000, USA).

140

141 To analyze the cation exchange capability (CEC), we followed the US EPA method 9080  
142 [8]. Soil samples were first sieved through a 2-mm screen and dried at 60 °C. A 5.0 g portion of  
143 the dried, sieved soil was weighed into a 50 mL Falcon tube, and 25 mL of 1 M ammonium  
144 acetate ( $\text{NH}_4\text{OAc}$ ) solution was added. The mixture was shaken for 30 min and centrifuged at  
145 100,000 rpm for 15 min at 25 °C. The supernatant ( $\text{NH}_4\text{OAc}$  extract) was discarded, and the  
146 extraction step was repeated three additional times to ensure complete saturation. The soil was  
147 then washed with 95% ethanol to remove residual  $\text{NH}_4\text{OAc}$  by adding enough ethanol to cover  
148 the soil surface, capping the tube, inverting it several times, allowing the soil to settle, and  
149 discarding the ethanol. This washing process was repeated four more times. Subsequently, 25  
150 mL of 1 M KCl was added to the soil to displace the adsorbed  $\text{NH}_4^+$ . The mixture was shaken  
151 for 30 min and centrifuged at 10,000 rpm for 15 min at 25 °C. The supernatant was filtered  
152 through a 0.45  $\mu\text{m}$  Whatman filter paper to collect the extract containing displaced  $\text{NH}_4^+$ . Steps  
153 involving KCl addition, shaking, centrifugation, and filtration were repeated three more times,  
154 and the extracts were combined. The concentration of  $\text{NH}_4^+\text{-N}$  in the combined extract was  
155 determined colorimetrically. Then CEC was measured by the following equation:  $[\text{CEC (cmol}_c$   
156  $\text{kg}^{-1}) = (\text{NH}_4\text{-N in extract} - \text{NH}_4\text{-N in blank}) / 18]$ . All samples were prepared in duplicate, and the  
157 average and standard deviation were calculated from the replicate measurements.

158

159

160

161

162

163 **Text S7.** Details of the statistical analyses conducted in this study.

164

165 A comprehensive data sheet in Excel (2021, version 16.54) was prepared with the  
166 concentration of analyzed PFAS in community garden and agricultural soils. For the average  
167 concentration and standard deviation of PFAS, we considered two replicates of PFAS for each  
168 depth in the soils. We observed that the concentration of PFAS was not normally distributed. To  
169 test the data normality, we performed Shapiro-Wilks tests on PFAS concentrations using JMP  
170 Pro (version 17.2) (Table S9). We observed that the concentration of all the PFAS was not  
171 normally distributed. In order to get a normal distribution of the data, we transformed the  
172 concentration of each PFAS into natural Log-transformed PFAS using JMP Pro (version 17.2).  
173 Several studies transformed the absolute concentration of PFAS into Log-transformed PFAS to  
174 conduct multivariate statistical analysis [9, 10]. We also performed Kruskal-Wallis one-way  
175 ANOVA analysis (non-parametric test) on the concentration of total PFAS and PFAS classes in  
176 soils across depths. This was performed to check the mean variability of total PFAS and PFAS  
177 classes.

178

179 Polynomial regression analysis was performed on (1) Log-transformed SOM vs. Log-  
180 transformed PFAS classes and total PFAS, (2) Log-transformed DOM vs. Log-transformed  
181 PFAS classes and total PFAS, (3) Log-transformed CEC vs. Log-transformed PFAS classes  
182 and total PFAS to predict the relationship using OriginPro (version 2025, 10.05). We adjusted  
183 the missing values (i.e., when targeted PFAS were not measured in soils) as blank, meaning 'no  
184 data' during statistical analysis. Several studies adjusted the non-identified and non-measured  
185 targeted PFAS in different environmental matrices (i.e., soil and water) as blank, referring to 'no  
186 data' for performing multivariate statistical analysis [11, 12]. Spearman correlation analysis was  
187 performed to predict the relationship between the analyzed PFAS and other parameters  
188 (conductivity, pH, DOM, SOM, CEC, anions, soil texture, moisture, EEM indices, and DOM  
189 fractions) of soils using OriginPro (version 2025, 10.05). For both polynomial and Spearman  
190 correlation, we set the significance value at  $\alpha=0.05$ . For correlation analysis, we considered a  
191 significant correlation when the correlation coefficient ( $r$ ) exceeded 0.5 ( $r>0.5$ ) and the P-value  
192 was less than 0.05.

193

194

195

196 **Table S1.** Sampling location coordinates for community garden soils. Samples were collected  
197 from each location at depths of 0, 1, and 2 ft and composited depth-wise to represent

198 community garden soils within each depth category. Exact coordinates were not available for  
 199 the agricultural and background soil sampling locations.

| Sample Type           | Sample Location Coordinates |            |
|-----------------------|-----------------------------|------------|
|                       | Latitude                    | Longitude  |
| Community Garden Soil | 46.914474                   | -96.797309 |
|                       | 46.914506                   | -96.797177 |
|                       | 46.914663                   | -96.797118 |
|                       | 46.914663                   | -96.797289 |
|                       | 46.914649                   | -96.797434 |
|                       | 46.914654                   | -96.797579 |
|                       | 46.914851                   | -96.797593 |
|                       | 46.914465                   | -96.797552 |
|                       | 46.914524                   | -96.797447 |

200

201 **Table S2.** Certified concentrations of the mass-labelled PFAS in the PFAS extraction standard  
 202 solution/mixture (MPFAC-HIF-ES, Wellington Laboratories, Canada).

| Mass-labelled PFAS | Extended forms of the Mass-labelled PFAS                                                                 | Certified Concentration (ng mL <sup>-1</sup> ) |
|--------------------|----------------------------------------------------------------------------------------------------------|------------------------------------------------|
| MPFBA              | Perfluoro-n-( <sup>13</sup> C <sub>4</sub> ) butanoic acid                                               | 2000                                           |
| M5PFPeA            | Perfluoro-n-( <sup>13</sup> C <sub>5</sub> ) pentanoic acid                                              | 1000                                           |
| M5PFHxA            | Perfluoro-n-(1,2,3,4,6- <sup>13</sup> C <sub>5</sub> ) hexanoic acid                                     | 500                                            |
| M4PFHpA            | Perfluoro-n-(1,2,3,4- <sup>13</sup> C <sub>4</sub> ) heptanoic acid                                      | 500                                            |
| M8PFOA             | Perfluoro-n-( <sup>13</sup> C <sub>8</sub> ) octanoic acid                                               | 500                                            |
| M9PFNA             | Perfluoro-n-( <sup>13</sup> C <sub>9</sub> ) nonanoic acid                                               | 250                                            |
| M6PFDA             | Perfluoro-n-(1,2,3,4,5,6- <sup>13</sup> C <sub>6</sub> ) decanoic acid                                   | 250                                            |
| M7PFUdA            | Perfluoro-n-(1,2,3,4,5,6,7- <sup>13</sup> C <sub>7</sub> ) undecanoic acid                               | 250                                            |
| MPFDoA             | Perfluoro-n-(1,2- <sup>13</sup> C <sub>2</sub> ) dodecanoic acid                                         | 250                                            |
| M2PFTeDA           | Perfluoro-n-(1,2- <sup>13</sup> C <sub>2</sub> ) tetra decanoic acid                                     | 250                                            |
| M8FOSA             | Perfluoro-1-( <sup>13</sup> C <sub>8</sub> ) octane sulfonamide                                          | 500                                            |
| d-N-MeFOSA         | N-methyl-d3-perfluoro-1-octanesulfonamide                                                                | 500                                            |
| d-N-EtFOSA         | N-ethyl-d5-perfluoro-1-octanesulfonamide                                                                 | 500                                            |
| d3-N-MeFOSAA       | N-methyl-d3-perfluoro-1-octanesulfonamidoacetic acid                                                     | 1000                                           |
| d5-N-EtFOSAA       | N-ethyl-d5-perfluoro-1-octanesulfonamidoacetic acid                                                      | 1000                                           |
| d7-N-MeFOSE        | 2-(N-methyl-d3-perfluoro-1-octanesulfonamido) ethane-d4-ol                                               | 5000                                           |
| d9-N-EtFOSE        | 2-(N-ethyl-d5-perfluoro-1-octanesulfonamido) ethane-d4-ol                                                | 5000                                           |
| M3HFPO-DA          | 2,3,3,3-Tetrafluoro-2-(1,1,2,2,3,3,3-heptafluoropropoxy) ( <sup>13</sup> C <sub>3</sub> ) propanoic acid | 2000                                           |
| M3PFBS             | Sodium perfluoro-1-(2,3,4- <sup>13</sup> C <sub>3</sub> ) butane sulfonate                               | 500                                            |
| M3PFHxS            | Sodium perfluoro-1-(1,2,3- <sup>13</sup> C <sub>3</sub> ) hexane sulfonate                               | 500                                            |
| M8PFOS             | Sodium perfluoro-1-( <sup>13</sup> C <sub>8</sub> ) octane sulfonate                                     | 500                                            |
| M2-4:2FTS          | Sodium 1H,2H,2H-perfluoro(1,2- <sup>13</sup> C <sub>2</sub> ) hexane sulfonate                           | 1000                                           |
| M2-6:2FTS          | Sodium 1H,2H,2H-perfluoro(1,2- <sup>13</sup> C <sub>2</sub> ) octane sulfonate                           | 1000                                           |
| M2-8:2FTS          | Sodium 1H,2H,2H-perfluoro(1,2- <sup>13</sup> C <sub>2</sub> ) decan sulfonate                            | 1000                                           |

203 **Table S3.** Extracted internal standard (EIS) and non-extracted internal standard (NIS) were  
 204 utilized for the quantification of targeted PFAS in this study [13].

| Targeted PFAS in Soil               | Quantification Reference Compound     |
|-------------------------------------|---------------------------------------|
| PFBA                                | <sup>13</sup> C <sub>4</sub> -PFBA    |
| PFPeA                               | <sup>13</sup> C <sub>5</sub> -PFPeA   |
| PFHxA                               | <sup>13</sup> C <sub>5</sub> -PFHxA   |
| PFHpA                               | <sup>13</sup> C <sub>4</sub> -PFHpA   |
| PFOA                                | <sup>13</sup> C <sub>8</sub> -PFOA    |
| PFNA                                | <sup>13</sup> C <sub>9</sub> -PFNA    |
| PFDA                                | <sup>13</sup> C <sub>6</sub> -PFDA    |
| PFUnA                               | <sup>13</sup> C <sub>7</sub> -PFUnA   |
| PFDoA                               | <sup>13</sup> C <sub>2</sub> -PFDoA   |
| PFTTrDA                             | <sup>13</sup> C <sub>2</sub> -PFTTrDA |
| PFTeDA                              | <sup>13</sup> C <sub>2</sub> -PFTeDA  |
| PFBS                                | <sup>13</sup> C <sub>3</sub> -PFBS    |
| PFPeS                               | <sup>13</sup> C <sub>3</sub> -PFHxS   |
| PFHxS                               | <sup>13</sup> C <sub>3</sub> -PFHxS   |
| PFHpS                               | <sup>13</sup> C <sub>8</sub> -PFOS    |
| PFOS                                | <sup>13</sup> C <sub>8</sub> -PFOS    |
| PFNS                                | <sup>13</sup> C <sub>8</sub> -PFOS    |
| PFDS                                | <sup>13</sup> C <sub>8</sub> -PFOS    |
| PFDoS                               | <sup>13</sup> C <sub>8</sub> -PFOS    |
| 4:2FTS                              | <sup>13</sup> C <sub>2</sub> -4:2FTS  |
| 6:2FTS                              | <sup>13</sup> C <sub>2</sub> -6:2FTS  |
| 8:2FTS                              | <sup>13</sup> C <sub>2</sub> -8:2FTS  |
| PFOSA                               | <sup>13</sup> C <sub>8</sub> -PFOSA   |
| NMeFOSA                             | D <sub>3</sub> -NMeFOSA               |
| NEtFOSA                             | D <sub>5</sub> -NEtFOSA               |
| NMeFOSAA                            | D <sub>3</sub> -NMeFOSAA              |
| NEtFOSAA                            | D <sub>5</sub> -N-EtFOSAA             |
| NMeFOSE                             | D <sub>7</sub> -NMeFOSE               |
| NEtFOSE                             | D <sub>9</sub> -NEtFOSE               |
| HFPO-DA                             | <sup>13</sup> C <sub>3</sub> -HFPO-DA |
| ADONA                               | <sup>13</sup> C <sub>3</sub> -HFPO-DA |
| 9Cl-PF3ONS                          | <sup>13</sup> C <sub>3</sub> -HFPO-DA |
| 11Cl-PF3OUdS                        | <sup>13</sup> C <sub>3</sub> -HFPO-DA |
| 3:3FTCA                             | <sup>13</sup> C <sub>5</sub> -PFPeA   |
| 5:3FTCA                             | <sup>13</sup> C <sub>5</sub> -PFHxA   |
| 7:3FTCA                             | <sup>13</sup> C <sub>5</sub> -PFHxA   |
| PFEESA                              | <sup>13</sup> C <sub>5</sub> -PFHxA   |
| PFMPA                               | <sup>13</sup> C <sub>5</sub> -PFPeA   |
| PFMBA                               | <sup>13</sup> C <sub>5</sub> -PFPeA   |
| NFDHA                               | <sup>13</sup> C <sub>5</sub> -PFHxA   |
| <b>EIS Compounds</b>                |                                       |
| <sup>13</sup> C <sub>4</sub> -PFBA  | N/A                                   |
| <sup>13</sup> C <sub>5</sub> -PFPeA |                                       |
| <sup>13</sup> C <sub>5</sub> -PFHxA |                                       |
| <sup>13</sup> C <sub>4</sub> -PFHpA |                                       |
| <sup>13</sup> C <sub>8</sub> -PFOA  |                                       |
| <sup>13</sup> C <sub>9</sub> -PFNA  |                                       |
| <sup>13</sup> C <sub>6</sub> -PFDA  |                                       |
| <sup>13</sup> C <sub>7</sub> -PFUnA |                                       |
| <sup>13</sup> C <sub>2</sub> -PFDoA |                                       |

|                          |     |
|--------------------------|-----|
| <sup>13</sup> C2-PFTeDA  |     |
| <sup>13</sup> C3-PFBS    |     |
| <sup>13</sup> C3-PFHxS   |     |
| <sup>13</sup> C8-PFOS    |     |
| <sup>13</sup> C2-4:2FTS  |     |
| <sup>13</sup> C2-6:2FTS  |     |
| <sup>13</sup> C2-8:2FTS  |     |
| <sup>13</sup> C8-PFOSA   |     |
| D3-NMeFOSA               |     |
| D5-NEtFOSA               |     |
| D3-NMeFOSAA              |     |
| D5-NEtFOSAA              |     |
| D7-NMeFOSE               |     |
| D9-NEtFOSE               |     |
| <sup>13</sup> C3-HFPO-DA |     |
| <b>NIS Compounds</b>     |     |
| <sup>13</sup> C3-PFBA    |     |
| <sup>13</sup> C2-PFHxA   |     |
| <sup>13</sup> C4-PFOA    | N/A |
| <sup>13</sup> C5-PFNA    |     |
| <sup>13</sup> C2-PFDA    |     |
| <sup>18</sup> O2-PFHxS   |     |
| <sup>13</sup> C4-PFOS    |     |

205

206 N/A – These analytes do not produce a confirmation ion mass or do not have a quantitation  
 207 reference compound.

208

209

210

211

212

213

214

215

216

217

218

219

220 **Table S4.** Investigated PFAS, their classes, and subclasses. The number in parentheses refers  
 221 to the number of carbons in that PFAS [14, 15].

| Analyzed PFAS | Extended Form | PFAS Class | PFAS Subclass |
|---------------|---------------|------------|---------------|
|---------------|---------------|------------|---------------|

|                                 |                                                         |                                      |                                          |
|---------------------------------|---------------------------------------------------------|--------------------------------------|------------------------------------------|
| PFBA (4)                        | Perfluorobutanoic Acid                                  | Perfluoroalkyl acids (PFAAs)         | Perfluorocarboxylic acids (PFCAs)        |
| PFDA (10)                       | Perfluorodecanoic acid                                  |                                      |                                          |
| PFDoA (12)                      | Perfluorododecanoic acid                                |                                      |                                          |
| PFHpA (7)                       | Perfluoroheptanoic acid                                 |                                      |                                          |
| PFHxA (6)                       | Perfluorohexanoic acid                                  |                                      |                                          |
| PFNA (9)                        | Perfluorononanoic acid                                  |                                      |                                          |
| PFOA (8)                        | Perfluorooctanoic acid                                  |                                      |                                          |
| PFPeA (5)                       | Perfluoropentanoic acid                                 |                                      |                                          |
| PFTeDA (14)                     | Perfluorotetradecanoic acid                             |                                      |                                          |
| PFTTrDA (13)                    | Perfluorotridecanoic acid                               |                                      |                                          |
| PFUdA (11)                      | Perfluoro-undecanoic acid                               |                                      |                                          |
| PFBS (4)                        | Perfluorobutane sulfonic acid                           |                                      | Perfluorosulfonic acids (PFSAs)          |
| PFDoS (12)                      | Perfluorododecane sulfonic acid                         |                                      |                                          |
| PFDS (10)                       | Perfluorodecane sulfonic acid                           |                                      |                                          |
| PFHpS (7)                       | Perfluoroheptane sulfonic acid                          |                                      |                                          |
| B. PFHxS (6)                    | Branched Perfluorohexane sulfonic acid                  |                                      |                                          |
| L. PFHxS (6)                    | Linear Perfluorohexane sulfonic acid                    |                                      |                                          |
| PFNS (9)                        | Perfluorononane sulfonic acid                           |                                      |                                          |
| B. PFOS (8)                     | Branched Perfluorooctane sulfonic acid                  |                                      |                                          |
| L. PFOS (8)                     | Linear Perfluorooctane sulfonic acid                    |                                      |                                          |
| PFPeS (5)                       | Perfluoropentane sulfonic acid                          |                                      |                                          |
| 11-Cl-PF <sub>3</sub> OUdS (10) | 11-chloroeicosafluoro-3-oxaundecane-1-sulfonic acid     |                                      | Perfluoro ether sulfonic acids (PFESAs)  |
| 9-Cl-PF <sub>3</sub> ONS (8)    | Perfluoro(2-((6-chlorohexyl) oxy) ethane sulfonic acid) |                                      |                                          |
| PFEESA (4)                      | Perfluoro(2-ethoxyethane) sulphonic acid                |                                      | Perfluoro ether carboxylic acid (PFECAs) |
| GenX (HFPO-DA) (6)              | Hexafluoropropylene oxide (HFPO) dimer acid             |                                      |                                          |
| NADONA (7)                      | Sodium dodecafluoro-3H-4,8-dioxanonoate                 |                                      |                                          |
| NFDHA (5)                       | Perfluoro-3,6-dioxaheptanoic acid- 3,6-OPFHpA           |                                      |                                          |
| PFMBA (5)                       | PF5OHxA - Perfluoro-4-methoxybutanoic acid              |                                      |                                          |
| PFMPA (4)                       | PF4OPeA-Perfluoro-3-methoxypropanoic acid               |                                      |                                          |
| EiFOSA (10)                     | N-Ethylperfluorooctane-1-sulfonamide                    | Perfluoroalkane sulfonamides (PASFs) |                                          |
| EiFOSAA (12)                    | N-ethyl perfluorooctane sulfonamido acetic acid         |                                      |                                          |
| EiFOSE (12)                     | N-ethyl perfluorooctanesulfonamidoethanol               |                                      |                                          |
| FOSA-1 (8)                      | Perfluorooctanesulfonamide                              |                                      |                                          |
| MeFOSA (9)                      | N-Methylperfluorooctanesulfonamide                      |                                      |                                          |
| MeFOSAA (11)                    | N-Methylperfluorooctanesulfonamidoacetic acid           |                                      |                                          |
| MeFOSE (11)                     | N-Methylperfluorooctanesulfonamidoethanol               |                                      |                                          |
| 3:3 FTCA (6)                    | 3:3 Fluorotelomer carboxylic acid                       |                                      | Fluorotelomer carboxylic acids (FTCAs)   |
| 5:3 FTCA (8)                    | 5:3 Fluorotelomer carboxylic acid                       |                                      |                                          |
| 7:3 FTCA (10)                   | 7:3 Fluorotelomer carboxylic acid                       |                                      |                                          |
| 4:2 FTS (6)                     | 4:2 Fluorotelomer sulfonic acid                         | Fluorotelomer sulfonic acids (FTSs)  |                                          |
| 6:2 FTS (8)                     | 6:2 Fluorotelomer sulfonic acid                         |                                      |                                          |
| 8:2 FTS (10)                    | 8:2 Fluorotelomer sulfonic acid                         |                                      |                                          |

222

223 **Table S5.** The gradient program is used to run the Ultra-performance liquid chromatography  
224 (UPLC–MS/MS) analysis. Mobile Phase A = 5 mM ammonium acetate in LC-MS grade water,  
225 and Mobile Phase B = LC-MS grade Acetonitrile.

| Time (min) | Flowrate (mL/min) | % of Phase A | % of Phase B |
|------------|-------------------|--------------|--------------|
|------------|-------------------|--------------|--------------|

|     |     |    |     |
|-----|-----|----|-----|
| 0   | 0.5 | 70 | 30  |
| 0.5 | 0.5 | 70 | 30  |
| 3   | 0.5 | 10 | 90  |
| 3.1 | 0.5 | 0  | 100 |
| 4.5 | 0.5 | 70 | 100 |
| 4.6 | 0.5 | 30 | 30  |
| 6.5 | 0.5 | 70 | 30  |

226

227 **Table S6.** Soil physiochemical characteristics, including conductivity, moisture, organic matter,  
 228 cation exchange capability, concentration of anions, pH, soil texture, DOM components,  
 229 ultraviolet, and fluorescence 3D excitation-emission matrix (3D EEM) spectroscopy indices for  
 230 characterizing soils.

| Parameters          | Unit                              | Types of Soil     |        |       |             |       |       |
|---------------------|-----------------------------------|-------------------|--------|-------|-------------|-------|-------|
|                     |                                   | Agricultural Soil |        |       | Garden Soil |       |       |
|                     |                                   | 0 ft              | 0.5 ft | 1 ft  | 0 ft        | 1 ft  | 2 ft  |
| Conductivity        | $\mu\text{s cm}^{-1}$             | 1380              | 840    | 1114  | 1566        | 800   | 634.2 |
| MC                  | %                                 | 11.6              | 23.1   | 26.7  | 32.7        | 30.6  | 32.1  |
| SOM                 | %                                 | 3.1               | 2.7    | 2.4   | 3.5         | 2.6   | 2.1   |
| DOM                 | $\text{mg kg}^{-1}$               | 375               | 295    | 292   | 588         | 223   | 149   |
| CEC                 | $\text{cmol}_c \text{ kg}^{-1}$   | 36                | 17     | 15    | 37          | 19    | 17    |
| Chloride            | $\text{mg kg}^{-1}$               | 17.5              | 43.1   | 33.6  | 25.6        | 30.7  | 18.3  |
| Nitrite             | $\text{mg kg}^{-1}$               | 0.3               | 0.9    | 1     | 8.2         | 3.1   | 1     |
| Nitrate             | $\text{mg kg}^{-1}$               | 7.1               | 4.0    | 1.2   | 8.3         | 4.1   | 4.5   |
| Sulfate             | $\text{mg kg}^{-1}$               | 75.7              | 103.1  | 133.4 | 107.4       | 109.7 | 81.4  |
| Phosphate           | $\text{mg kg}^{-1}$               | ----              | ----   | ----  | 2.3         | ----  | ----  |
| pH                  | ----                              | 6.7               | 6.9    | 6.9   | 6.6         | 6.8   | 6.6   |
| Sand                | %                                 | 5.5               | 2.7    | 2.5   | 5.0         | 1.6   | 2.1   |
| Slit                | %                                 | 55.7              | 57.3   | 60    | 48.7        | 46    | 44.2  |
| Clay                | %                                 | 38.8              | 40     | 37.5  | 46.2        | 52.5  | 53.7  |
| Humic-like          | au                                | 2653              | 1240   | 965   | 2770        | 2060  | 1610  |
| Fulvic-like         | au                                | 2175              | 1260   | 1000  | 2330        | 2000  | 1570  |
| FI                  | ----                              | 1.6               | 1.7    | 1.5   | 1.6         | 1.6   | 1.4   |
| BIX                 | ----                              | 0.9               | 0.6    | 0.3   | 1.2         | 0.5   | 0.3   |
| HIX                 | ----                              | 1.3               | 0.9    | 0.7   | 1.4         | 0.9   | 0.6   |
| SUVA <sub>254</sub> | $\text{L mg}^{-1} \text{ m}^{-1}$ | 0.6               | 0.5    | 0.3   | 0.7         | 0.3   | 0.2   |

231

232 **Table S7.** Fluorescence 3D excitation-emission matrix spectroscopy parameters of the  
 233 dissolved organic matter extracted from soils at different depths.

| Depth (ft) | Community Garden Soil | Ref. |
|------------|-----------------------|------|
|------------|-----------------------|------|

|                          | Identified Peaks | Excitation Wavelength (nm) | Emission Wavelength (nm) | Highest Intensity (au) | Fluorescent Compounds  |          |  |
|--------------------------|------------------|----------------------------|--------------------------|------------------------|------------------------|----------|--|
| 0 ft                     | A                | 320-340                    | 430-450                  | 2,770                  | Human-like substances  | [16, 17] |  |
|                          | B                | 220-260                    | 420-460                  | 2,330                  | Fulvic-like substances |          |  |
| 1 ft                     | A                | 320-340                    | 430-450                  | 2,060                  | Human-like substances  |          |  |
|                          | B                | 220-260                    | 420-460                  | 2,000                  | Fulvic-like substances |          |  |
| 2 ft                     | A                | 320-340                    | 430-450                  | 1,610                  | Human-like substances  |          |  |
|                          | B                | 220-260                    | 420-460                  | 1,570                  | Fulvic-like substances |          |  |
| <b>Agricultural Soil</b> |                  |                            |                          |                        |                        |          |  |
| 0 ft                     | A                | 320-340                    | 430-450                  | 2,650                  | Human-like substances  |          |  |
|                          | B                | 220-260                    | 420-460                  | 2,190                  | Fulvic-like substances |          |  |
| 0.5 ft                   | A                | 320-340                    | 430-450                  | 1,270                  | Human-like substances  |          |  |
|                          | B                | 220-260                    | 420-460                  | 1,250                  | Fulvic-like substances |          |  |
| 1 ft                     | A                | 320-340                    | 430-450                  | 970                    | Human-like substances  |          |  |
|                          | B                | 220-260                    | 420-460                  | 990                    | Fulvic-like substances |          |  |

234

235

236

237

238

239

240

241 **Table S8.** The details of ultraviolet and fluorescence 3D excitation-emission matrix (3D EEM)  
 242 spectroscopy indices used to characterize the dissolved organic matter (DOM) extracted from  
 243 soils.

| Indices | Equation | Specific Excitation (Ex) | Uses | Standard Range | Ref. |
|---------|----------|--------------------------|------|----------------|------|
|---------|----------|--------------------------|------|----------------|------|

|                                                              |                                                                               | Wavelength, nm |                                                  |                                                                                                        |         |
|--------------------------------------------------------------|-------------------------------------------------------------------------------|----------------|--------------------------------------------------|--------------------------------------------------------------------------------------------------------|---------|
| SUVA <sub>254</sub><br>(L mg <sup>-1</sup> m <sup>-1</sup> ) | Absorbance at UV <sub>254</sub> (m <sup>-1</sup> ) /DOC (mg L <sup>-1</sup> ) | ---            | To characterize the aromaticity of DOM molecules | The higher the value, the higher the aromaticity                                                       | [4, 5]  |
| Fluorescence Index (FI)                                      | Intensity of Em 470/ Em 520                                                   | Ex 370         | To identify the sources                          | Microbial activity is the main source of DOM when FI>1.8, terrestrial and microbial sources 1.4<FI>1.8 | [6]     |
| Biological Index (BIX)                                       | Intensity of Em 380/ Em 430                                                   | Ex 310         | To estimate biologically derived components      | BIX>0.7 indicates medium to high levels of biological components due to high microbial activity        | [7, 18] |
| Humification Index (HIX)                                     | Average Intensity of (Em 435-480)/ (Em 300-345)                               | Ex 255         | To characterize the degree of humification       | When HIX<0.8, the degree of humification is low; When HIX>0.8, the degree of humification is high      | [6]     |

244

245

246

247

248

249

250

251

252

253

254

255

256

257

258 **Table S9.** Normality test of the analyzed PFAS in the community garden and agricultural soil.  
 259 PFAS concentrations are reported on a dry-weight basis.

| Analyzed PFAS and Classes | Sample size, N | Statistic | P-value | Decision at level at $\alpha=0.05$ level |
|---------------------------|----------------|-----------|---------|------------------------------------------|
|---------------------------|----------------|-----------|---------|------------------------------------------|

|          |    |         |         |                  |
|----------|----|---------|---------|------------------|
| PFBA     | 12 | 0.68105 | <0.0001 | Reject normality |
| PFPeA    | 12 | 0.68499 | <0.0001 | Reject normality |
| PFHxA    | 12 | 0.76269 | <0.0001 | Reject normality |
| PFHpA    | 12 | 0.79076 | <0.0001 | Reject normality |
| PFOA     | 12 | 0.7456  | <0.0001 | Reject normality |
| PFNA     | 12 | 0.62618 | <0.0001 | Reject normality |
| PFDA     | 12 | 0.69685 | <0.0001 | Reject normality |
| PFUdA    | 12 | 0.74568 | <0.0001 | Reject normality |
| PFDoA    | 12 | 0.73023 | <0.0001 | Reject normality |
| PFBS     | 12 | 0.70507 | <0.0001 | Reject normality |
| B. PFHxS | 12 | 0.75    | <0.0001 | Reject normality |
| L. PFHxS | 12 | 0.74568 | <0.0001 | Reject normality |
| PFHxS    | 12 | 0.73506 | <0.0001 | Reject normality |
| B. PFOS  | 12 | 0.73023 | <0.0001 | Reject normality |
| L. PFOS  | 12 | 0.6505  | <0.0001 | Reject normality |
| PFOS     | 12 | 0.66233 | <0.0001 | Reject normality |
| 6:2 FTS  | 12 | 0.69885 | <0.0001 | Reject normality |
| ∑PFCA    | 12 | 0.78843 | <0.0001 | Reject normality |
| ∑PFSA    | 12 | 0.76061 | <0.0001 | Reject normality |
| ∑PFAA    | 12 | 0.7552  | <0.0001 | Reject normality |
| ∑FTS     | 12 | 0.75885 | <0.0001 | Reject normality |
| ∑FTS     | 12 | 0.73939 | <0.0001 | Reject normality |
| ∑PFAS    | 12 | 0.75252 | <0.0001 | Reject normality |

260

261 **Table S10.** Kruskal-Wallis one-way ANOVA analysis (significant at 0.05) of the individual PFAS  
262 compounds in community garden soil and agricultural soil.

| Null Hypothesis                                                                                | Test                                     | Significant at 0.05 | Decision                   |
|------------------------------------------------------------------------------------------------|------------------------------------------|---------------------|----------------------------|
| The concentration of individual PFAS is the same in the community garden and agricultural soil | Independent -Samples Kruskal-Wallis test | <0.001              | Reject the null hypothesis |
| Test Summary                                                                                   |                                          |                     |                            |
| Total N                                                                                        | 38                                       |                     |                            |
| Test Statistics                                                                                | 20.221                                   |                     |                            |
| Degree of Freedom                                                                              | 2                                        |                     |                            |
| Asymptotic Significance                                                                        | <0.001                                   |                     |                            |

263 **Table S11.** Detected PFAS species and their concentrations in community garden, agricultural,  
264 and background soils. Linear and branched isomers were combined for PFHxS and PFOS and  
265 counted as one PFAS species for each compound. Numbers in parentheses indicate the carbon  
266 number of the corresponding PFAS compound.

| PFAS Classes                | Detected PFAS | Community Garden Soil | Agricultural Soil   | Background Soil     |
|-----------------------------|---------------|-----------------------|---------------------|---------------------|
|                             |               | ng kg <sup>-1</sup>   | ng kg <sup>-1</sup> | ng kg <sup>-1</sup> |
| PFCAs                       | PFBA (4)      | 924±103               | 392±39              | 347±27              |
|                             | PFPeA (5)     | 523±91                | 182±9               | 98±4                |
|                             | PFHxA (6)     | 40±8                  | 33±1                | 77±1                |
|                             | PFHpA (7)     | 59±7                  | 63±10               | 118±5               |
|                             | PFOA (8)      | 185±47                | 146±7               | 281±1               |
|                             | PFNA (9)      | 119±10                | 122±4               | 179±7               |
|                             | PFDA (10)     | 143±0                 | 47±2                | 103±25              |
|                             | PFUdA (11)    | 96±5                  | 52±4                | 77±8                |
|                             | PFDoA (12)    | 17±1                  | 17±1                | 50±10               |
|                             | PFTTrDA (13)  |                       |                     | 28±1                |
|                             | PFTeDA (14)   |                       |                     | 14±2                |
| PFSAAs                      | PFBS (4)      | 39±2                  | 56±3                | 54±3                |
|                             | B. PFHxS (6)  |                       | 2±1                 | 12±2                |
|                             | L. PFHxS (6)  | 247±5                 | 19±1                | 85±7                |
|                             | PFHxS (6)     | 247±5                 | 21±1                | 96±9                |
|                             | B. PFOS (8)   | 257±101               | 59±5                | 237±38              |
|                             | L. PFOS (8)   | 1303±170              | 296±17              | 1069±20             |
|                             | PFOS (8)      | 1561±271              | 355±22              | 1305±59             |
| PFAS Precursors             | 6:2 FTS (8)   | 52±6                  | 37±2                | 28±2                |
|                             | EtFOSAA (12)  |                       |                     | 13±1                |
|                             | FOSA (8)      |                       |                     | 11±2                |
| PFAS Classes and total PFAS | ∑PFCA         | 2088±283              | 1054±76             | 1372±71             |
|                             | ∑PFSA         | 1847±278              | 432±50              | 1456±42             |
|                             | ∑PFAA         | 3934±210              | 1486±46             | 2827±32             |
|                             | ∑Precursors   | 52±6                  | 37±2                | 51±3                |
|                             | ∑PFAS         | 3987±146              | 1523±25             | 2878±110            |

267

268

269

270

271

272 **Table S12.** Kruskal-Wallis one-way ANOVA analysis (significant at 0.05) of PFAS classes, and  
273 total PFAS in community garden soil and agricultural soil.

| Null Hypothesis | Test | Significant at 0.05 | Decision |
|-----------------|------|---------------------|----------|
|-----------------|------|---------------------|----------|

|                                                                                                            |                                          |        |                            |
|------------------------------------------------------------------------------------------------------------|------------------------------------------|--------|----------------------------|
| The concentration of PFAS classes and total PFAS is the same in the community garden and agricultural soil | Independent -Samples Kruskal-Wallis test | <0.001 | Reject the null hypothesis |
| Test Summary                                                                                               |                                          |        |                            |
| Total N                                                                                                    | 10                                       |        |                            |
| Test Statistics                                                                                            | 16.567                                   |        |                            |
| Degree of Freedom                                                                                          | 2                                        |        |                            |
| Asymptotic Significance                                                                                    | <0.001                                   |        |                            |

274

275

276 **Table S13.** Polynomial regression analysis between soil organic matter (SOM) and PFAS  
 277 classes, and total PFAS at different depths in the community garden and agricultural soil.

| Equation            | $y = \text{Intercept} + B1 \cdot x^1 + B2 \cdot x^2$ |                    |                    |                |                    |
|---------------------|------------------------------------------------------|--------------------|--------------------|----------------|--------------------|
| PFAS Classes        | PFCAs                                                | PFSAs              | PFAAs              | $\Sigma$ FTS   | $\Sigma$ PFAS      |
| Intercept           | 10746.9 ± 9572.5                                     | 35712.2 ± 8631.9   | 46459.1 ± 16735.8  | -497.2 ± 783.9 | 46942.1 ± 15877.8  |
| B1                  | -8355.6 ± 6309.6                                     | -25124.57 ± 5689.7 | -33480.2 ± 11031.3 | 336.9 ± 516.7  | -33830.4 ± 10465.7 |
| B2                  | 1693.5 ± 1031.4                                      | 4436.5 ± 930.1     | 6130.1 ± 1803.3    | -51.7 ± 84.4   | 6195.7 ± 1710.9    |
| RSS                 | 64906.0                                              | 52777.8            | 198392.5           | 435.2          | 178571.7           |
| R <sup>2</sup>      | 0.96                                                 | 0.97               | 0.97               | 0.34           | 0.97               |
| Adj. R <sup>2</sup> | 0.94                                                 | 0.95               | 0.95               | -0.08          | 0.96               |
| P value             | 0.0001                                               | 0.0001             | 0.0001             | 0.54           | 0.0001             |

278

279

280 **Table S14.** Polynomial regression analysis between dissolved organic matter (DOM) and PFAS  
 281 classes, total PFAS at different depths in the community garden and agricultural soil.

| Equation            | $y = \text{Intercept} + B1 \cdot x^1 + B2 \cdot x^2$ |               |               |               |
|---------------------|------------------------------------------------------|---------------|---------------|---------------|
| PFAS Classes        | $\Sigma$ PFAA                                        | $\Sigma$ PFAS | $\Sigma$ PFCA | $\Sigma$ PFSA |
| Intercept           | 28.2 ± 7.1                                           | 26.5 ± 7.2    | 23.7 ± 8.2    | 35.2 ± 6.7    |
| B1                  | -21.4 ± 5.8                                          | -20.0 ± 5.9   | -17.6 ± 6.6   | -27.9 ± 5.4   |
| B2                  | 4.5 ± 1.1                                            | 4.2 ± 1.1     | 3.7 ± 1.3     | 5.9 ± 1.1     |
| RSS                 | 0.07                                                 | 0.07          | 0.09          | 0.06          |
| R <sup>2</sup>      | 0.84                                                 | 0.83          | 0.72          | 0.92          |
| Adj. R <sup>2</sup> | 0.77                                                 | 0.76          | 0.60          | 0.88          |
| P value             | 0.01                                                 | 0.01          | 0.04          | 0.002         |

282 **Table S15.** Polynomial regression analysis between cation exchange capacity (CEC) and PFAS  
 283 classes, total PFAS at different depths in the community garden and agricultural soil.

| Equation     | $y = \text{Intercept} + B1 \cdot x^1 + B2 \cdot x^2$ |               |               |               |
|--------------|------------------------------------------------------|---------------|---------------|---------------|
| PFAS Classes | $\Sigma$ PFAS                                        | $\Sigma$ PFCA | $\Sigma$ PFSA | $\Sigma$ PFAA |

|                     |            |            |             |            |
|---------------------|------------|------------|-------------|------------|
| Intercept           | -3.5 ± 8.8 | -8.3 ± 6.8 | 2.7 ± 13.8  | -4.4 ± 9.0 |
| B1                  | 8.4 ± 12.9 | 15.2 ± 9.9 | -2.0 ± 20.3 | 9.6 ± 13.2 |
| B2                  | -2.5 ± 4.6 | -5.0 ± 3.5 | 1.3 ± 7.3   | -2.9 ± 4.7 |
| RSS                 | 0.10       | 0.06       | 0.25        | 0.10       |
| R <sup>2</sup>      | 0.77       | 0.82       | 0.67        | 0.77       |
| Adj. R <sup>2</sup> | 0.67       | 0.74       | 0.53        | 0.66       |
| P Value             | 0.03       | 0.01       | 0.04        | 0.03       |

284

285

286

287

288

289

290

291

292

293

294

295

296

297

298

299

300

301

302

303

304

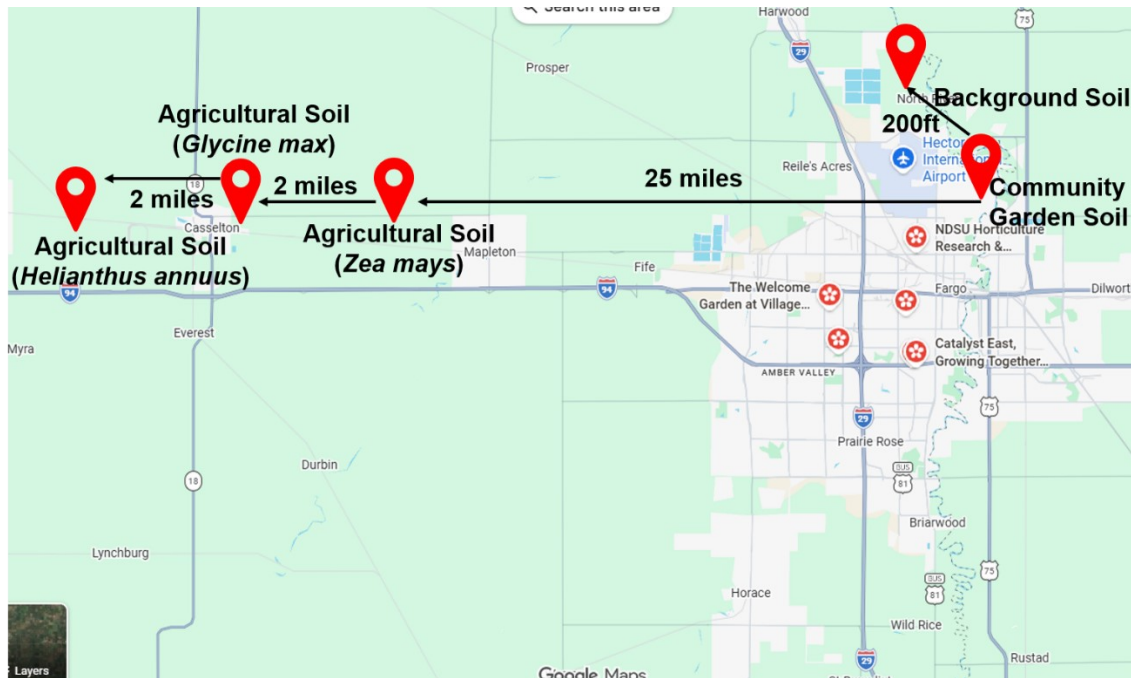

305

306 **Figure S1.** Study area map showing the approximate locations of the community garden,  
 307 background, and agricultural soil sampling sites, with the background soil site located  
 308 approximately 200 ft north-west of the community garden soil location, the corn (*Zea mays*)  
 309 agricultural field approximately 25 miles west of the community garden soil location, the  
 310 soybean (*Glycine max*) field approximately 2 miles west of the corn field, and the sunflower  
 311 (*Helianthus annuus*) field approximately 2 miles west of the soybean field.

312

313

314

315

316

317

318

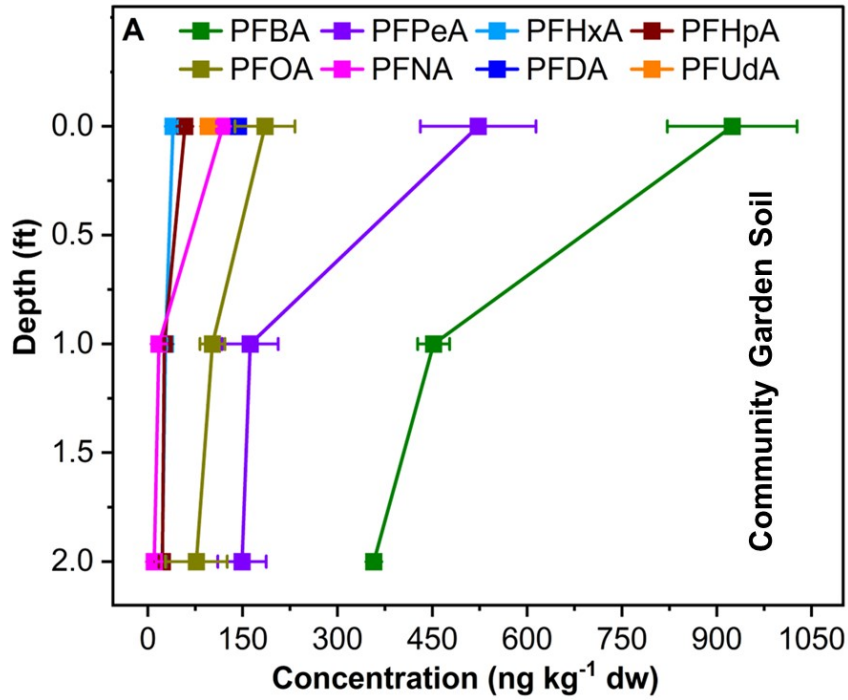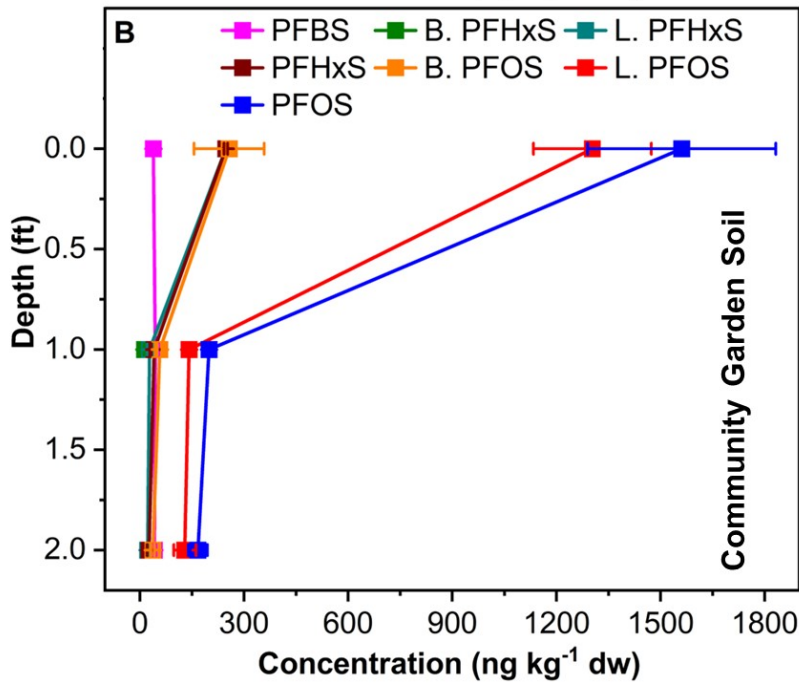

319

320 **Figure S2.** Concentrations of analyzed PFAS in community garden soil. Eight  
 321 perfluorocarboxylic acid PFAS species (A) and three perfluorosulfonic acid PFAS species (B)  
 322 were detected in community garden soil in all analyzed depths. The mean and standard error of  
 323 each compound were calculated from two replicates. Extended forms of PFAS are available in  
 324 Table S3.

325

326

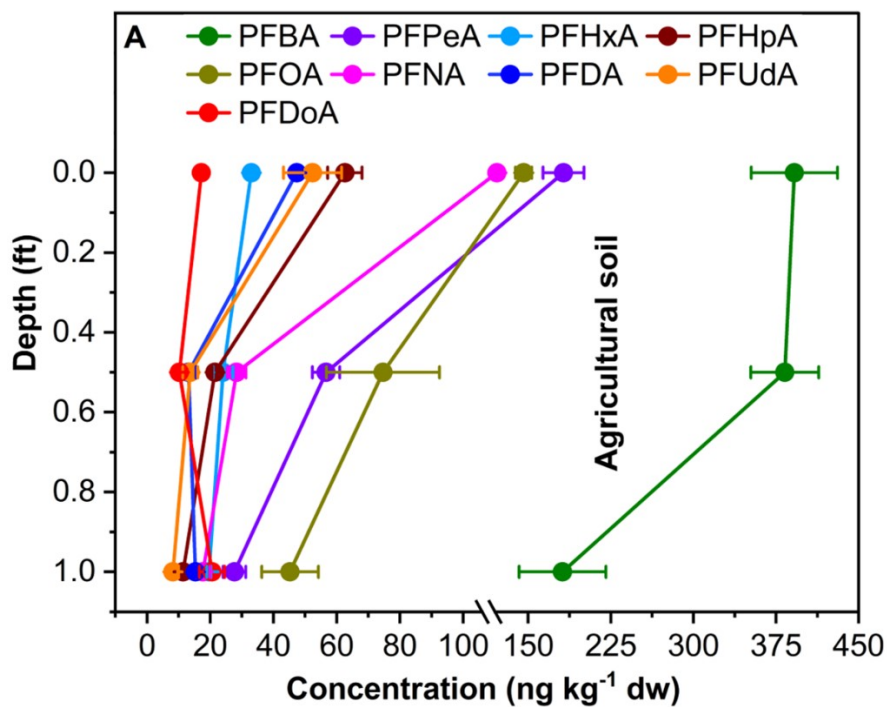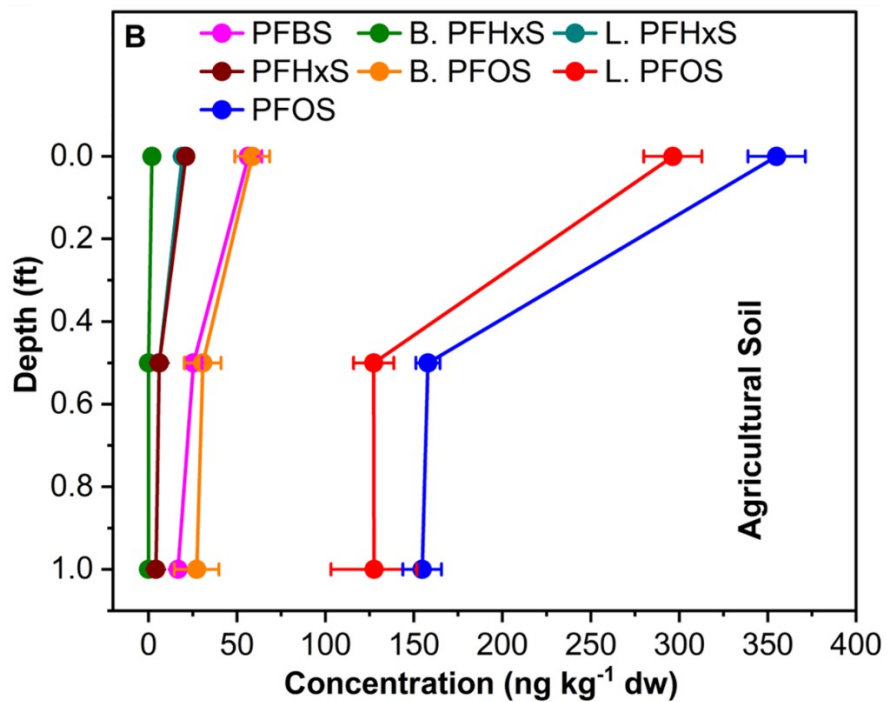

327

328 **Figure S3.** Concentrations of analyzed PFAS in agricultural soil. Nine perfluorocarboxylic acid  
 329 PFAS species (A) and three perfluorosulfonic acid PFAS species (B) were detected in  
 330 community garden soil in all analyzed depths. The mean and standard error of each compound  
 331 were calculated from two replicates. Extended forms of PFAS are available in Table S3.  
 332

333

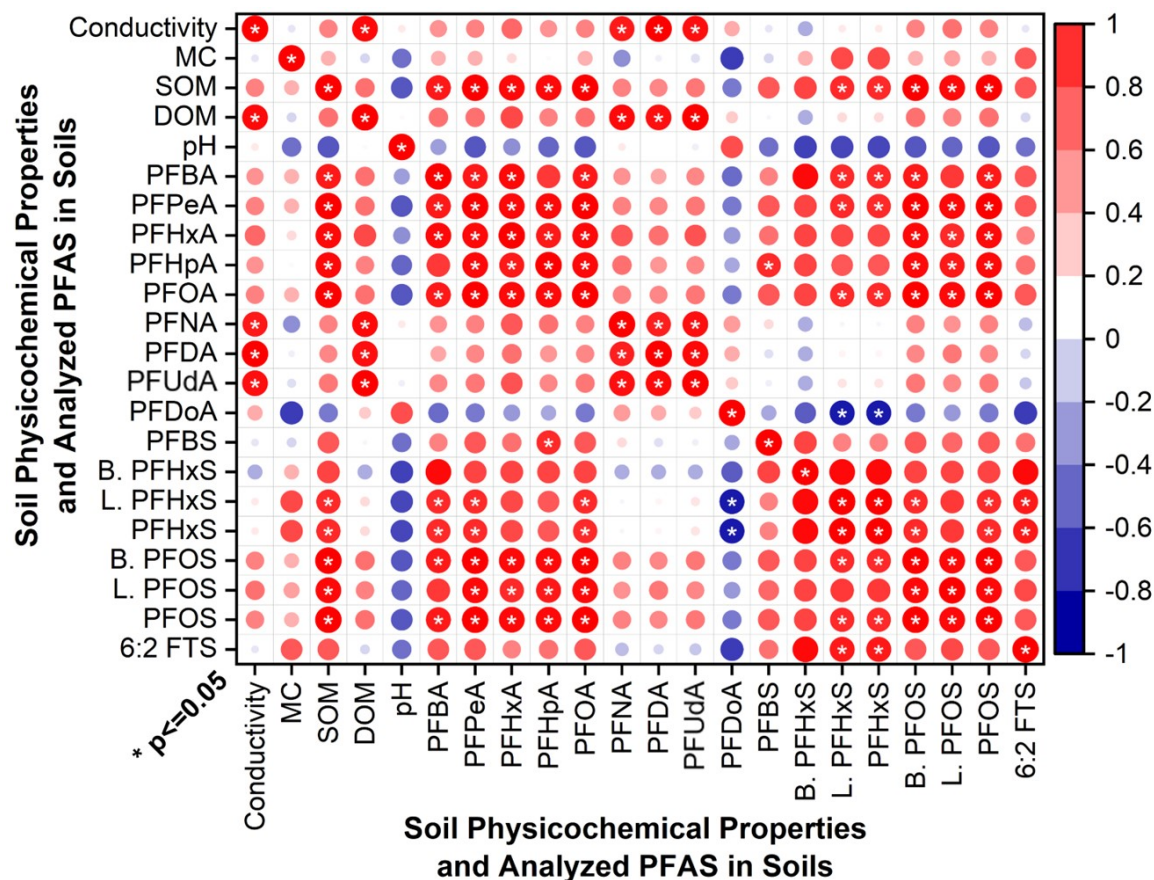

334

335 **Figure S4.** Spearman correlation analysis between soil physicochemical properties and  
 336 individual PFAS compounds at different soil depths in the community garden and agricultural  
 337 soil. Physicochemical properties include soil conductivity, moisture content (MC), soil organic  
 338 matter (SOM), dissolved organic matter (DOM), and pH. The red circle with ‘\*’ denotes a  
 339 significant correlation between the pairs. The red color in the right-side bar indicates the  
 340 intensity of a strong correlation, and the blue color denotes the intensity of a weak correlation  
 341 among the pairs. Extended forms of the PFAS are provided in Table S3.

342

343

344

345

346

347

348

349

350

351

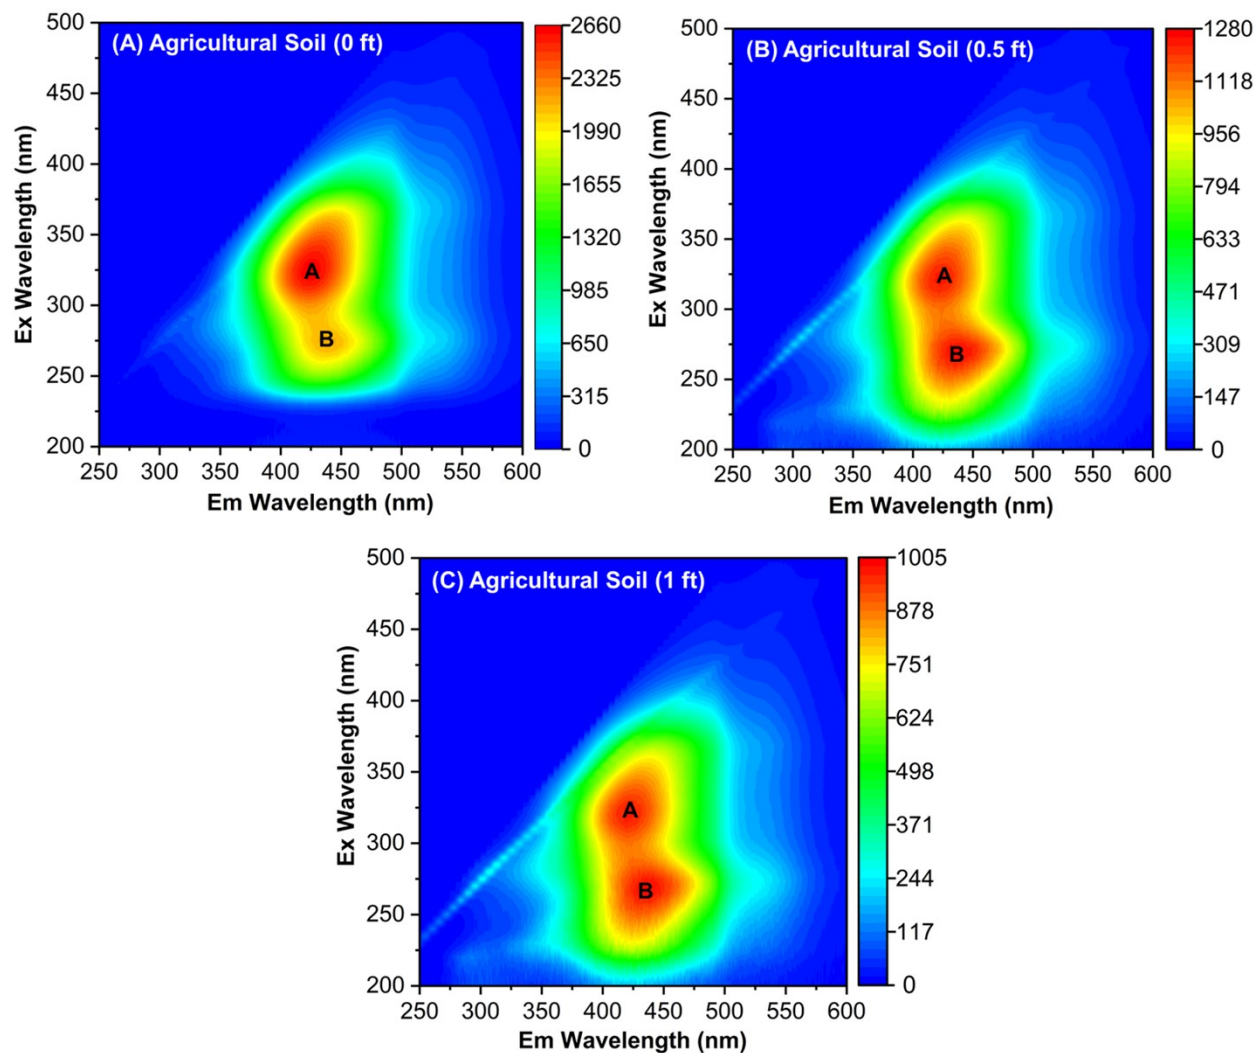

352

353 **Figure S5.** (A-C). Fluorescence three-dimensional excitation–emission matrix (3D EEM) spectra  
354 of dissolved organic matter (DOM) in agricultural soil. The three-dimensional data were plotted  
355 as two-dimensional contour plots to elucidate different organic fractions in soil DOM. Peaks A  
356 and B represent humic-like and fulvic-like substances, respectively. The highest fluorescence  
357 intensities of these peaks were considered to infer the relative levels of humic- and fulvic-like  
358 substances in soils across depths. Detailed excitation and emission wavelengths corresponding  
359 to the identified peaks are listed in Table S6.

360

361

362

363

364

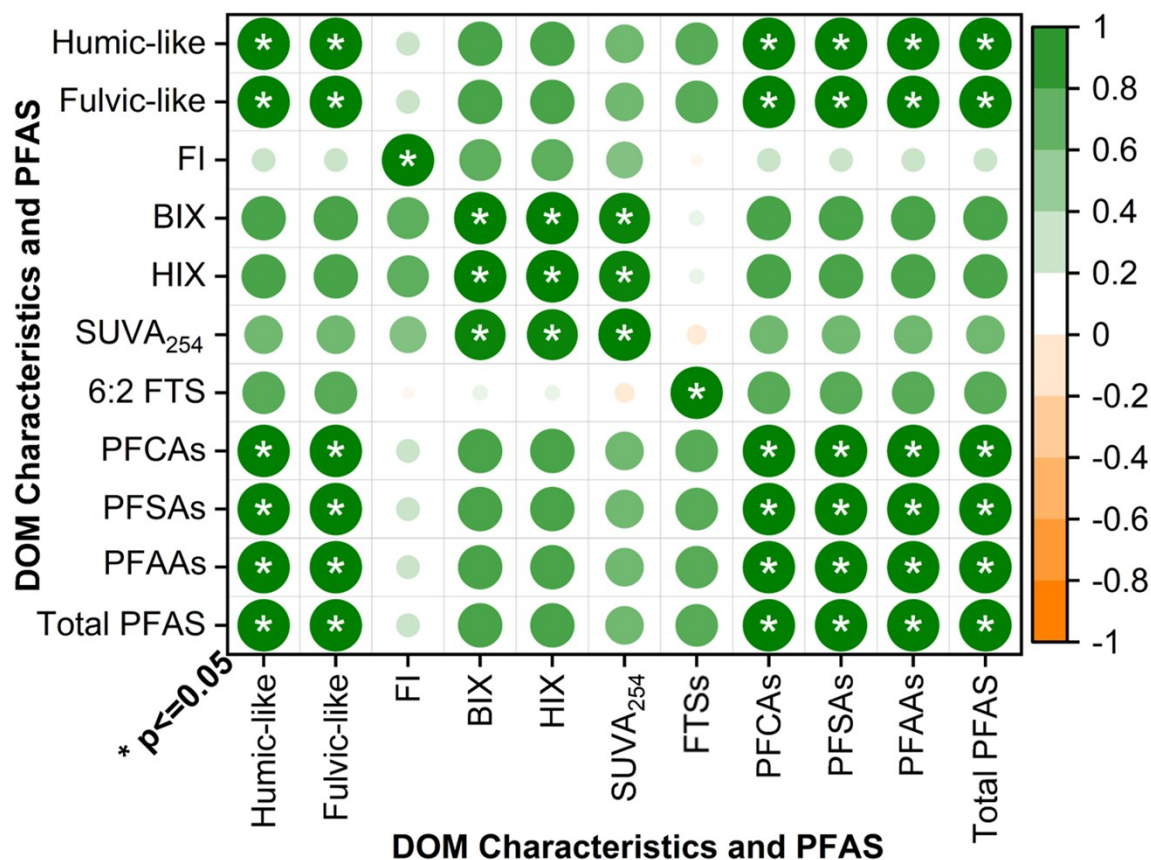

365

366 **Figure S6.** Spearman correlation analysis between dissolved organic matter characteristics and  
 367 PFAS classes, including total PFAS at different soil depths in the community garden and  
 368 agricultural soil. The highest intensity of humic- and fulvic-like substances was considered to  
 369 infer the relative levels of these components in soils at various depths, providing an indirect  
 370 measure of their concentrations. Fluorescence index (FI), biological index (BIX), and  
 371 humification index (HIX) were calculated based on excitation and emission absorbance data.  
 372 The green circle with “\*” denotes a significant correlation between the pairs. The green color in  
 373 the right-side bar indicates the intensity of a strong correlation, and the orange color denotes the  
 374 intensity of a weak correlation among the pairs. Extended forms of the PFAS are provided in  
 375 Table S3.

376

377

378

379

380

381

382

383

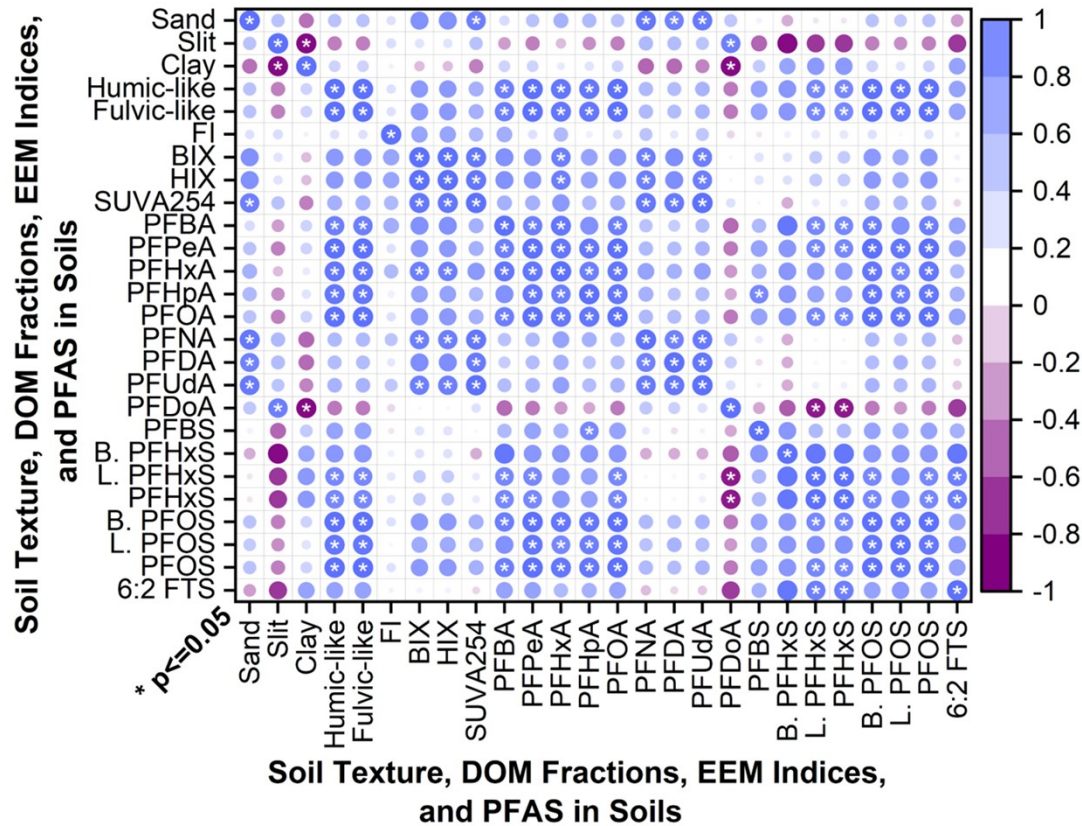

384

385 **Figure S7.** Spearman correlation analysis between soil texture, DOM components,  
 386 fluorescence indices, and analyzed PFAS in community garden and agricultural soil across  
 387 depths. Soil texture represents the percentage of sand, clay, and slit. The highest intensity of  
 388 humic- and fulvic-like substances was considered to infer the relative levels of these  
 389 components in soils at various depths, providing an indirect measure of their concentrations.  
 390 Fluorescence index (FI), biological index (BIX), and humification index (HIX) were calculated  
 391 based on excitation and emission absorbance data. The blue circle with "\*" denotes a significant  
 392 correlation between the pairs. The blue color in the right-side bar indicates the intensity of a  
 393 strong correlation, and the purple color denotes the intensity of a weak correlation among the  
 394 pairs. Extended forms of the PFAS are provided in Table S3.

395

396

397

398

399

400

401

402

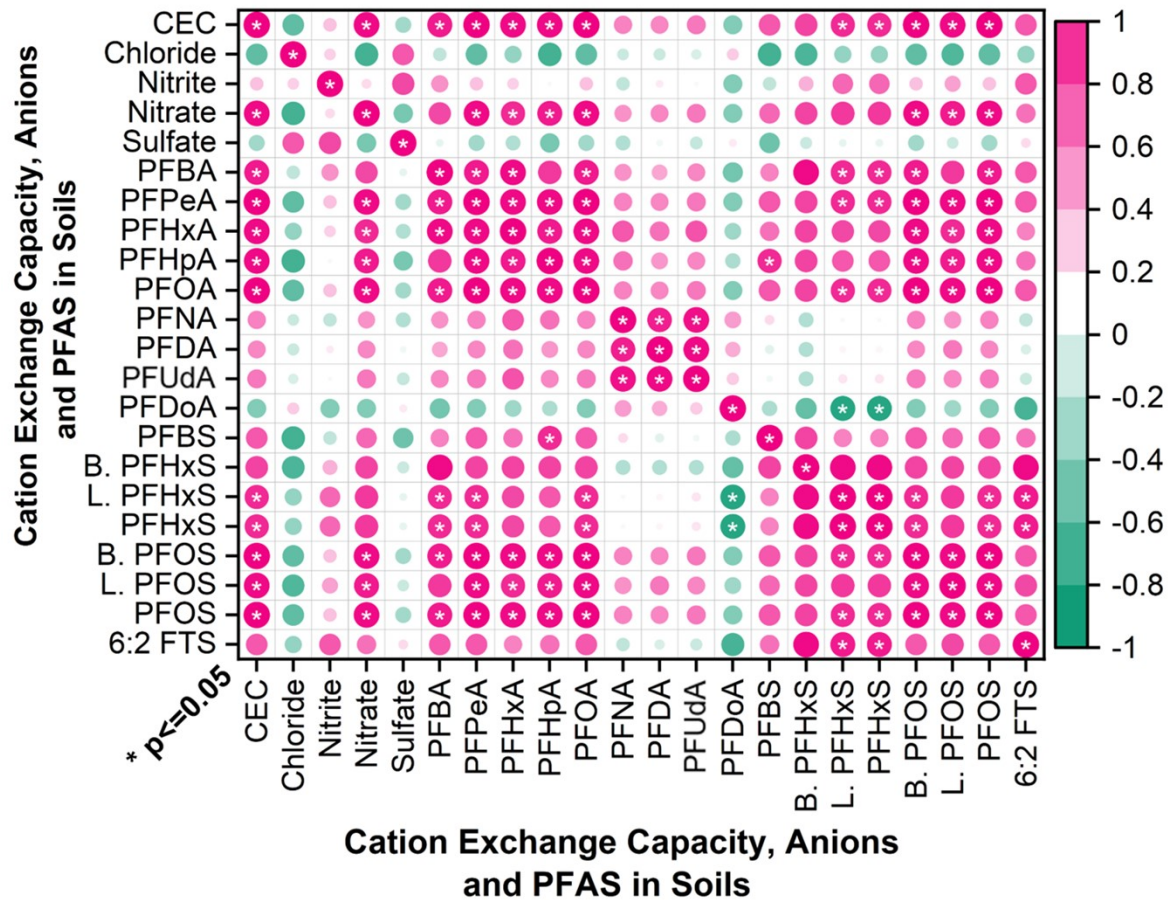

403

404 **Figure S8.** Spearman correlation analysis between cation exchange capacity, anion  
 405 concentrations, and analyzed PFAS in the community garden and agricultural soil across  
 406 depths. Among the measured anions, phosphate ( $\text{PO}_4^{3-}$ ) was excluded from this analysis  
 407 because it was detected only in surface soil from the community garden. The pink circle with ‘\*’  
 408 denotes a significant correlation between the pairs. The pink color in the right-side bar indicates  
 409 the intensity of a strong correlation, and the green color denotes the intensity of a weak  
 410 correlation among the pairs. Extended forms of the PFAS are provided in Table S3.

411

412

413

414

415

416

417

418

419

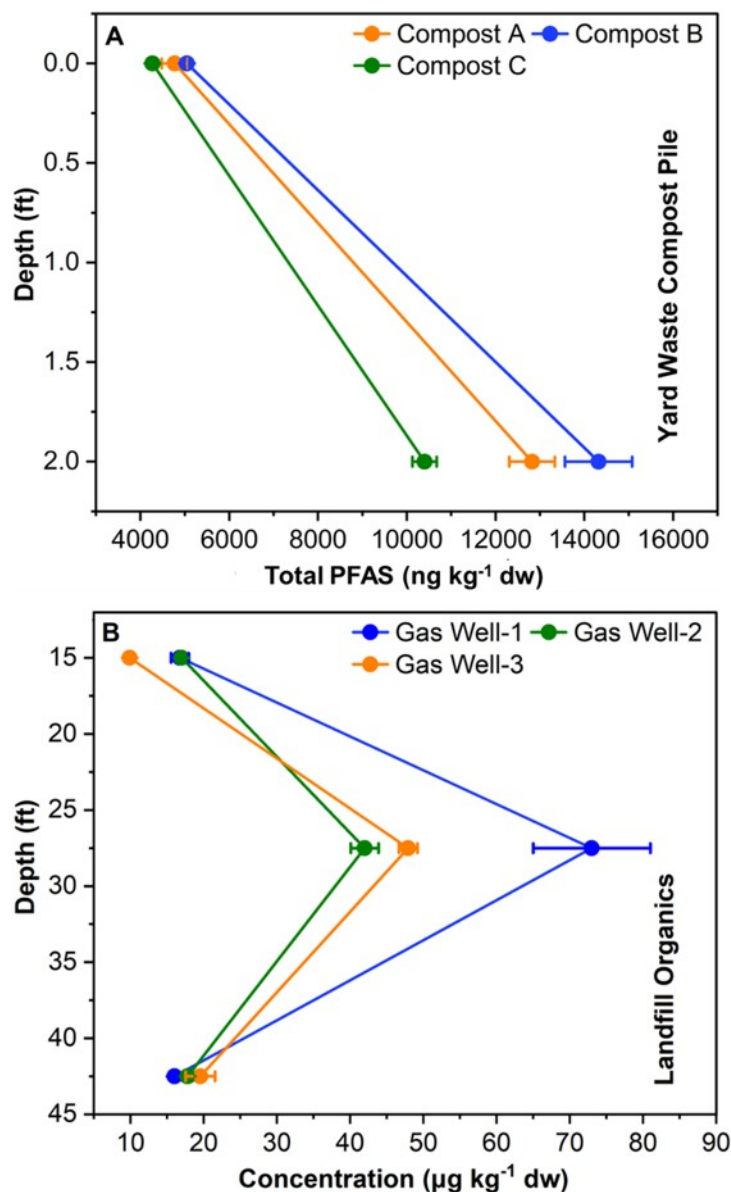

420

421 **Figure S9.** Vertical distribution of total PFAS concentrations in different environmental matrices.  
 422 The data for this figure were collected from our previous studies [1, 19]. A. Total PFAS  
 423 concentrations in an idle yard waste compost pile at different depths. Compost A, Compost B,  
 424 and Compost C are three randomly selected locations within the compost pile. B. Total PFAS  
 425 concentrations in landfill organics at different depths. Landfill organics were collected during  
 426 boring for gas-well installation; a total of seven gas wells were investigated and results for three  
 427 are shown here.

428

429

430

431

432 **References**

433

- 434 [1] B. Saha, M. Ateia, S. Fernando, J. Xu, T. DeSutter, and S. M. Iskander, "PFAS  
435 occurrence and distribution in yard waste compost indicate potential volatile loss,  
436 downward migration, and transformation," *Environmental Science: Processes & Impacts*,  
437 10.1039/D3EM00538K vol. 26, no. 4, pp. 657-666, 2024.
- 438 [2] ASTM D2974, "Standard Test Methods for Determining the Water (Moisture) Content,  
439 Ash Content, and Organic Material of Peat and Other Organic Soils," 2025.
- 440 [3] ASTM D3987-12, "Standard Practice for Shake Extraction of Solid Waste with Water,"  
441 2006.
- 442 [4] F. J. Rodríguez, P. Schlenger, and M. García-Valverde, "Monitoring changes in the  
443 structure and properties of humic substances following ozonation using UV-Vis, FTIR  
444 and (1)H NMR techniques," (in eng), *Sci Total Environ*, vol. 541, pp. 623-637, Jan 15  
445 2016, doi: 10.1016/j.scitotenv.2015.09.127.
- 446 [5] J. L. Weishaar, G. R. Aiken, B. A. Bergamaschi, M. S. Fram, R. Fujii, and K. Mopper,  
447 "Evaluation of Specific Ultraviolet Absorbance as an Indicator of the Chemical  
448 Composition and Reactivity of Dissolved Organic Carbon," *Environmental Science &  
449 Technology*, vol. 37, no. 20, pp. 4702-4708, 2003/10/01 2003, doi: 10.1021/es030360x.
- 450 [6] S. Huo, B. Xi, H. Yu, L. He, S. Fan, and H. Liu, "Characteristics of dissolved organic  
451 matter (DOM) in leachate with different landfill ages," *Journal of Environmental  
452 Sciences*, vol. 20, no. 4, pp. 492-498, 2008/01/01/ 2008, doi:  
453 [https://doi.org/10.1016/S1001-0742\(08\)62085-9](https://doi.org/10.1016/S1001-0742(08)62085-9).
- 454 [7] N. Peng, K. Wang, N. Tu, Y. Liu, and Z. Li, "Fluorescence regional integration combined  
455 with parallel factor analysis to quantify fluorescent spectra for dissolved organic  
456 matter released from manure biochars," *RSC Advances*, 10.1039/D0RA02706E vol. 10,  
457 no. 52, pp. 31502-31510, 2020, doi: 10.1039/D0RA02706E.
- 458 [8] USEPA Method 9080, "Cation-Exchange Capacity of Soils (AMMONIUM ACETATE)."  
459 2025. <https://www.epa.gov/sites/default/files/2015-12/documents/9080.pdf>
- 460 [9] J. M. Liddie, L. A. Schaider, and E. M. Sunderland, "Sociodemographic Factors Are  
461 Associated with the Abundance of PFAS Sources and Detection in U.S. Community  
462 Water Systems," *Environmental Science & Technology*, vol. 57, no. 21, pp. 7902-7912,  
463 2023/05/30 2023, doi: 10.1021/acs.est.2c07255.
- 464 [10] X. C. Hu *et al.*, "Detection of Poly- and Perfluoroalkyl Substances (PFASs) in U.S.  
465 Drinking Water Linked to Industrial Sites, Military Fire Training Areas, and Wastewater  
466 Treatment Plants," *Environmental Science & Technology Letters*, vol. 3, no. 10, pp. 344-  
467 350, 2016/10/11 2016, doi: 10.1021/acs.estlett.6b00260.
- 468 [11] D. Cserbik *et al.*, "Concentrations of per- and polyfluoroalkyl substances (PFAS) in  
469 paired tap water and blood samples during pregnancy," *Journal of Exposure Science &  
470 Environmental Epidemiology*, 2023/09/25 2023, doi: 10.1038/s41370-023-00581-7.
- 471 [12] M. Rovero *et al.*, "Limitations of Current Approaches for Predicting Groundwater  
472 Vulnerability from PFAS Contamination in the Vadose Zone," *Groundwater Monitoring &  
473 Remediation*, vol. 41, no. 4, pp. 62-75, 2021/09/01 2021, doi:  
474 <https://doi.org/10.1111/gwmr.12485>.
- 475 [13] USEPA. Method 1633 for 40 PFAS Compounds. Analysis of Per- and Polyfluoroalkyl  
476 Substances (PFAS) in Aqueous, Solid, Biosolids, and Tissue Samples by LC-MS/MS.  
477 [https://www.epa.gov/system/files/documents/2024-12/method-1633a-december-5-2024-  
478 508-compliant.pdf](https://www.epa.gov/system/files/documents/2024-12/method-1633a-december-5-2024-508-compliant.pdf)

- 479 [14] Z. Wang, J. C. DeWitt, C. P. Higgins, and I. T. Cousins, "A Never-Ending Story of Per-  
480 and Polyfluoroalkyl Substances (PFASs)?," *Environmental Science & Technology*, vol.  
481 51, no. 5, pp. 2508-2518, 2017/03/07 2017, doi: 10.1021/acs.est.6b04806.
- 482 [15] X. Lyu *et al.*, "Per- and Polyfluoroalkyl Substances (PFAS) in Subsurface Environments:  
483 Occurrence, Fate, Transport, and Research Prospect," *Reviews of Geophysics*, vol. 60,  
484 no. 3, p. e2021RG000765, 2022/09/01 2022, doi:  
485 <https://doi.org/10.1029/2021RG000765>.
- 486 [16] X.-S. He *et al.*, "Fluorescence excitation–emission matrix spectra coupled with parallel  
487 factor and regional integration analysis to characterize organic matter humification,"  
488 *Chemosphere*, vol. 93, no. 9, pp. 2208-2215, 2013/11/01/ 2013, doi:  
489 <https://doi.org/10.1016/j.chemosphere.2013.04.039>.
- 490 [17] J. J. Mobed, S. L. Hemmingsen, J. L. Autry, and L. B. McGown, "Fluorescence  
491 Characterization of IHSS Humic Substances: Total Luminescence Spectra with  
492 Absorbance Correction," *Environmental Science & Technology*, vol. 30, no. 10, pp.  
493 3061-3065, 1996/10/29 1996, doi: 10.1021/es960132l.
- 494 [18] J. Li *et al.*, "Transport of per-/polyfluoroalkyl substances from leachate to groundwater as  
495 affected by dissolved organic matter in landfills," *Environmental Research*, vol. 247, p.  
496 118230, 2024/04/15/ 2024, doi: <https://doi.org/10.1016/j.envres.2024.118230>.
- 497 [19] B. Saha *et al.*, "The unique distribution pattern of PFAS in landfill organics," *Journal of*  
498 *Hazardous Materials*, vol. 479, p. 135678, 2024/11/05/ 2024, doi:  
499 <https://doi.org/10.1016/j.jhazmat.2024.135678>.

500
